# Supplementary material
Source: Springer Nature journal article supplement (https://www.springermedizin.de/resource/supplementary/13012_2011_360_MOESM3_ESM.pdf/9629846)
Supplement: MOESM3 [file 9629846]

**Quality  
measure  
clearinghouse**

**Bibliographic  
database**

**Experts**

1489 indicators  
identified

688 not meeting  
inclusion criteria

801 individual indicators  
from 43 indicator sets

384  
duplicates

417  
indicators

318  
excluded by  
expert panel

2 added after  
pilot project

Quality indicator 'menu'  
99 individual indicators  
from 24 sets grouped  
into 37 items
